# Supplementary material
Source: Springer Nature journal article supplement (https://www.springermedizin.de/resource/supplementary/12969_2013_995_MOESM2_ESM.pdf/9589176)
Supplement: MOESM2 [file 9589176]

| Outcome measure                              | Baseline mean (SD) | Post-treatment mean (SD) | Post-treatment –Baseline |                       |                       | P value | Cohen's D |
|----------------------------------------------|--------------------|--------------------------|--------------------------|-----------------------|-----------------------|---------|-----------|
|                                              |                    |                          | Difference between means | Lower bound of 95% CI | Upper bound of 95% CI |         |           |
| Physical Functioning                         | 71.71 (21.7)       | 81.04 (19.8)             | 9.33                     | 2.74                  | 15.92                 | 0.008*  | 0.45      |
| Role limitations – emotional and behavioural | 82.99 (24.83)      | 88.43 (20.82)            | 5.44                     | -6.8                  | 17.68                 | 0.363   | 0.24      |
| Role limitations - physical                  | 70.66 (31.82)      | 77.08 (29.0)             | 6.42                     | -5.26                 | 18.1                  | 0.263   | 0.21      |
| Bodily Pain                                  | 42.19 (19.25)      | 57.92 (18.99)            | 15.73                    | 25.23                 | 6.23                  | 0.003*  | 0.82      |
| Behaviour                                    | 71.7 (14.85)       | 77.95 (18.49)            | 6.25                     | 1.8                   | 10.7                  | 0.009*  | 0.37      |
| Mental Health                                | 71.09 (16.6)       | 76.25 (14.91)            | 5.16                     | 1.31                  | 9.99                  | 0.011*  | 0.33      |
| Self Esteem                                  | 66.00 (20.04)      | 72.28 (15.48)            | 6.28                     | -0.26                 | -12.3                 | 0.042*  | 0.34      |
| General Health                               | 64.24 (18.33)      | 67.66 (17.18)            | 3.42                     | -4.22                 | 11.05                 | 0.359   | 0.19      |
| Parental Emotional Impact                    | 57.02 (28.29)      | 69.46 (24.02)            | 12.44                    | 2.51                  | 22.37                 | 0.017*  | 0.46      |
| Parental Time Impact                         | 83.33 (23.24)      | 85.48 (21.15)            | 2.15                     | -2.58                 | 6.87                  | 0.349   | 0.10      |
| Family Activities                            | 70.15 (27.51)      | 72.32 (28.41)            | 2.17                     | -6.47                 | 10.81                 | 0.600   | 0.08      |
| Family Cohesion                              | 71.07 (25.38)      | 70.64 (17.1)             | -0.54                    | -8.04                 | 7.17                  | 0.904   | 0.03      |

\*p<0.05 statistically significant
